# Supplementary material for: NW European shelf under climate warming: implications for open ocean – shelf exchange, primary production, and carbon absorption
Source: Copernicus journal article supplement (doi:10.5194/bg-10-3767-2013), 2013-06-12
Supplement: Supplementary file 1 [file bg-10-3767-2013-supplement.zip]

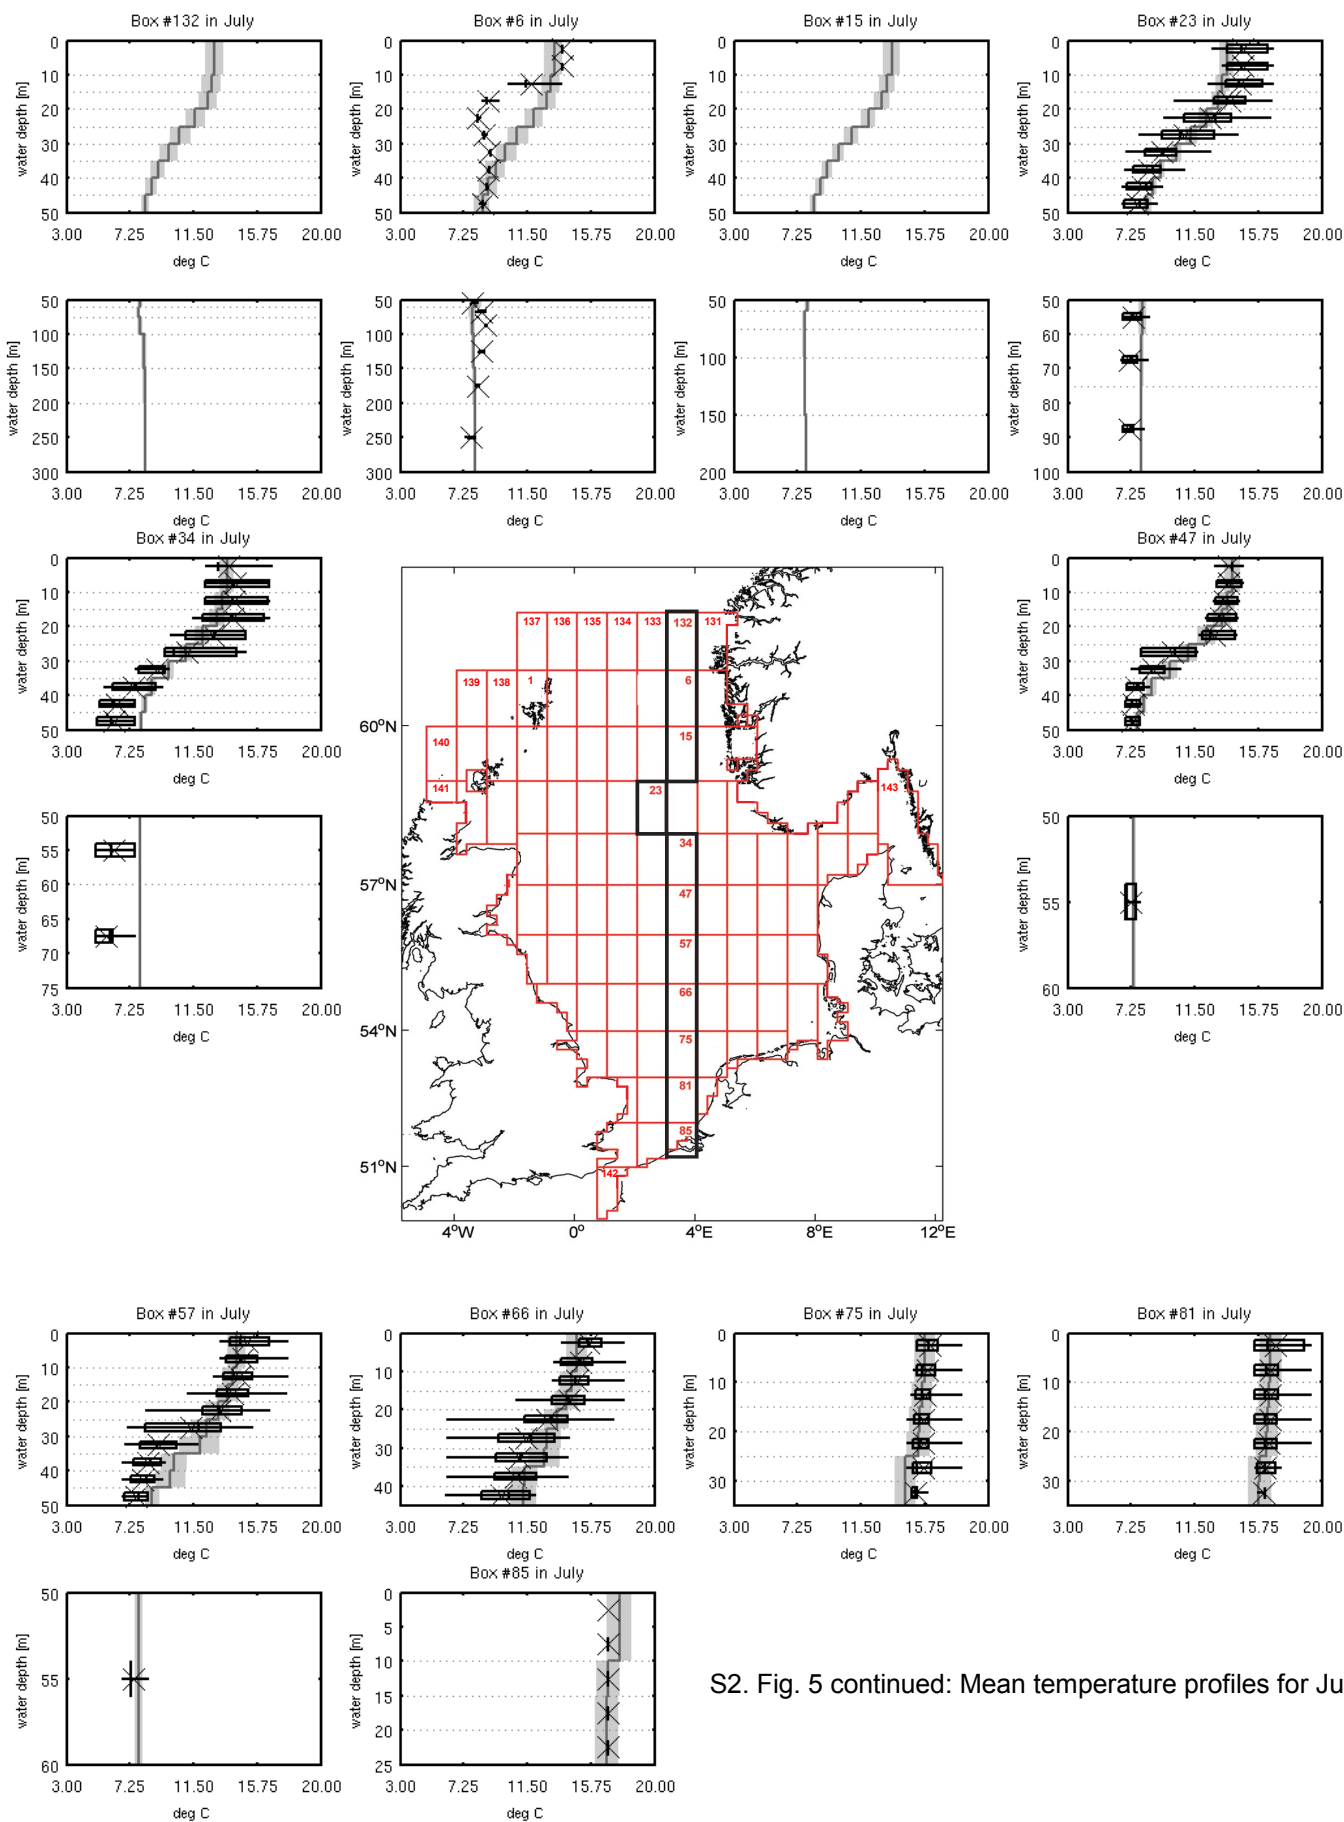

S2. Fig. 5 continued: Mean temperature profiles for July

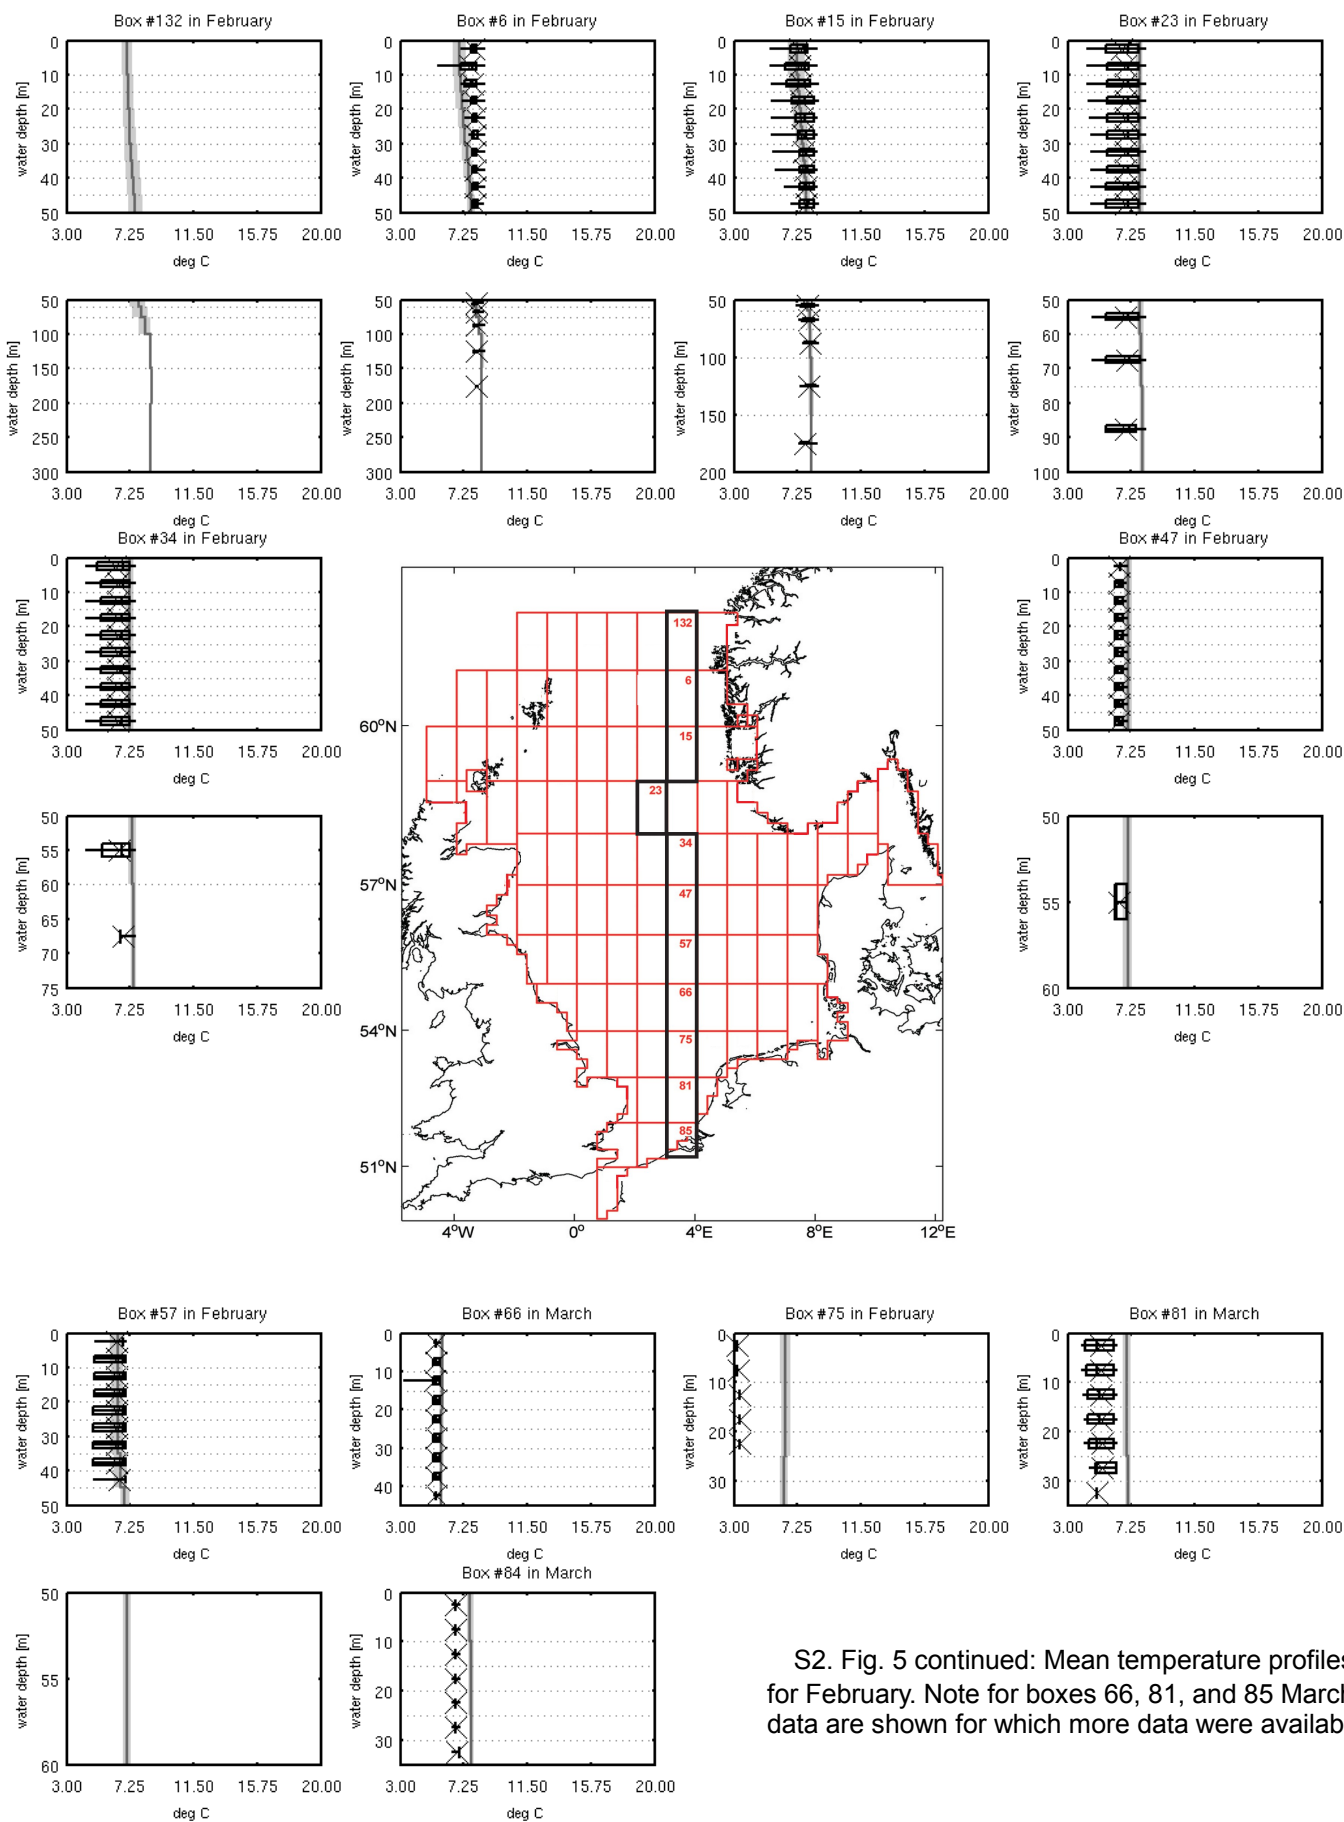

S2. Fig. 5 continued: Mean temperature profiles for February. Note for boxes 66, 81, and 85 March data are shown for which more data were available.

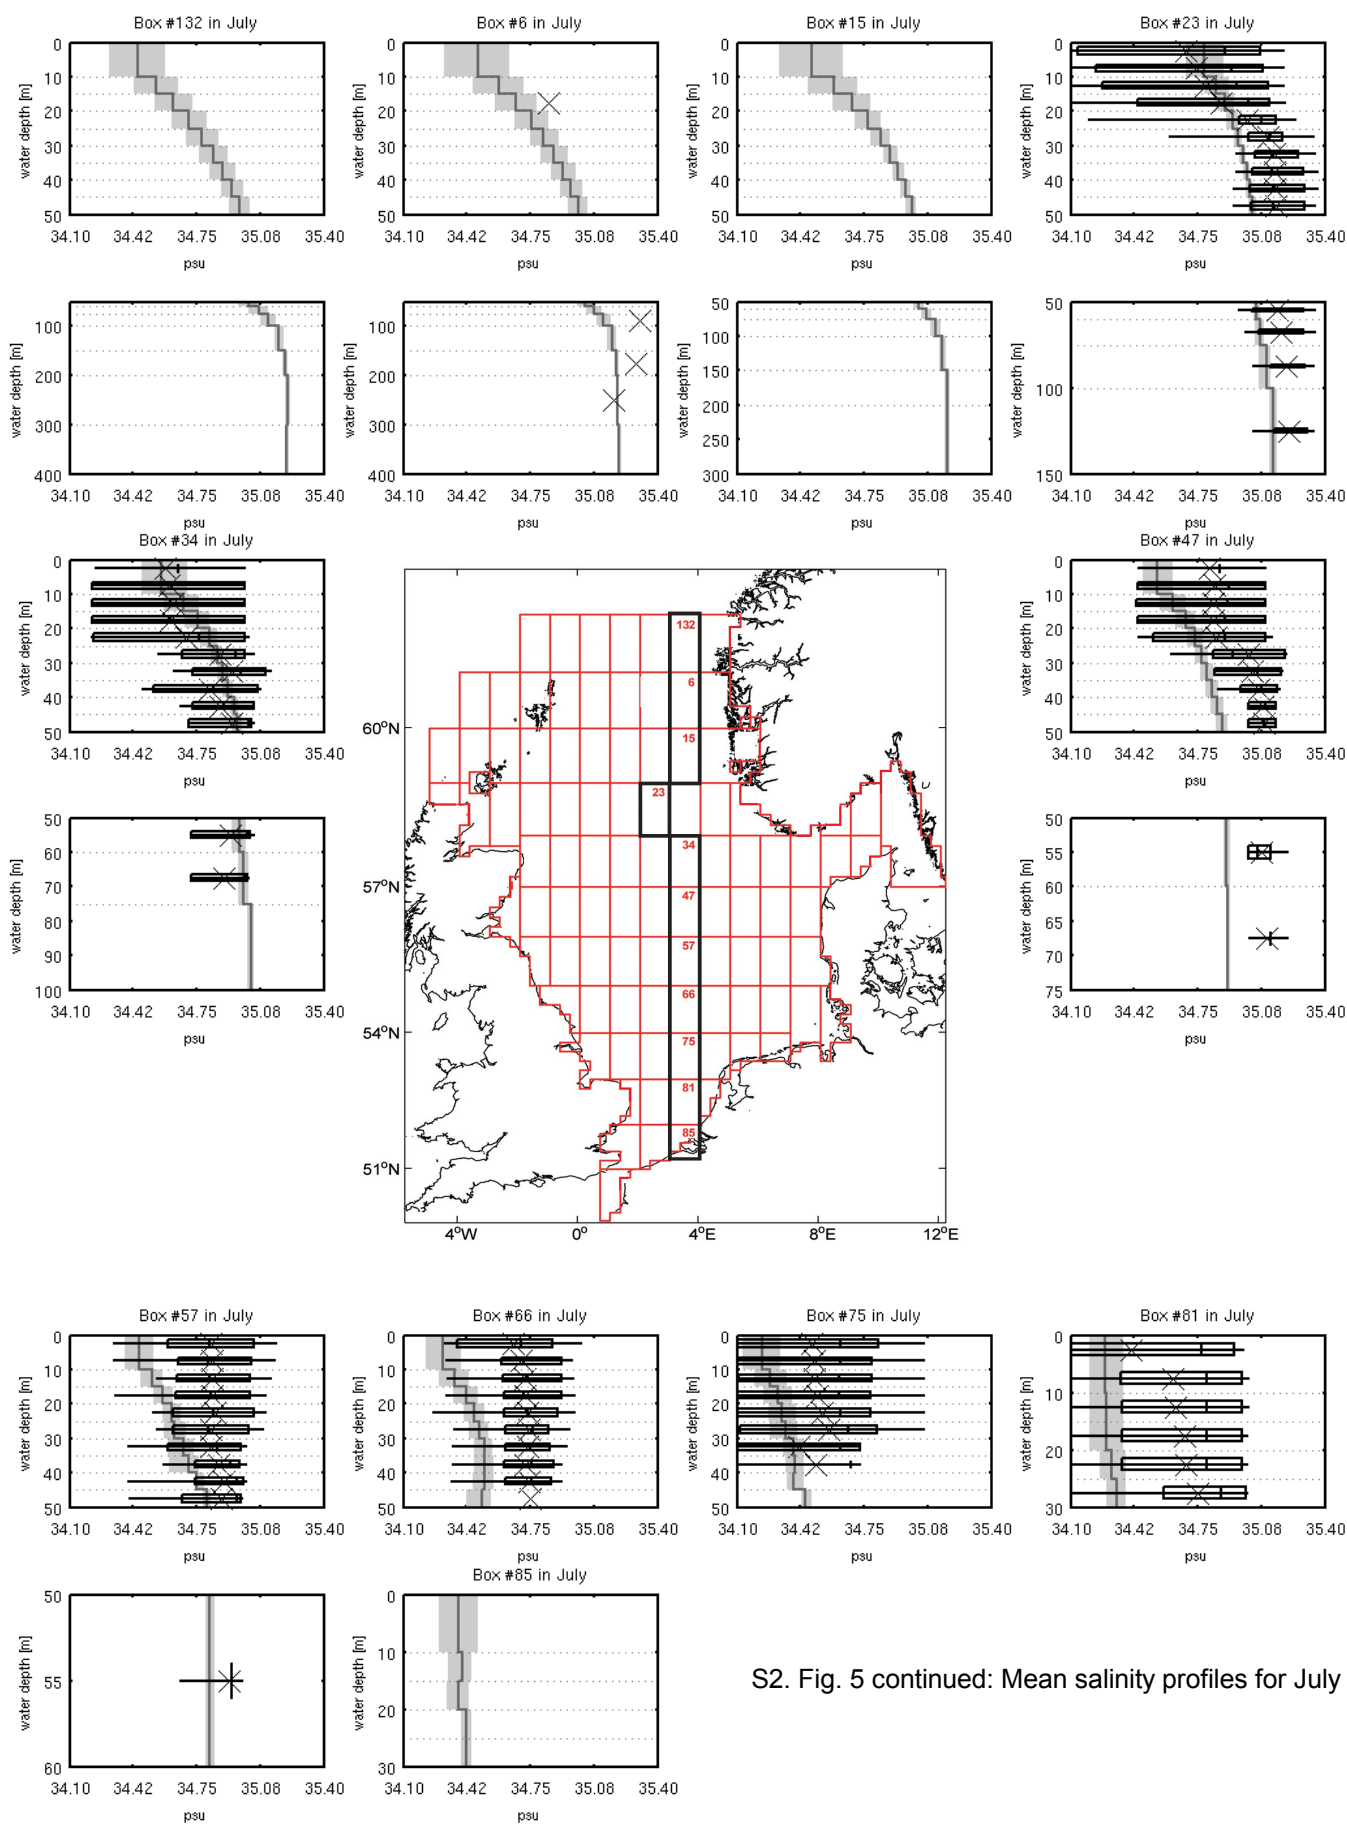

S2. Fig. 5 continued: Mean salinity profiles for July

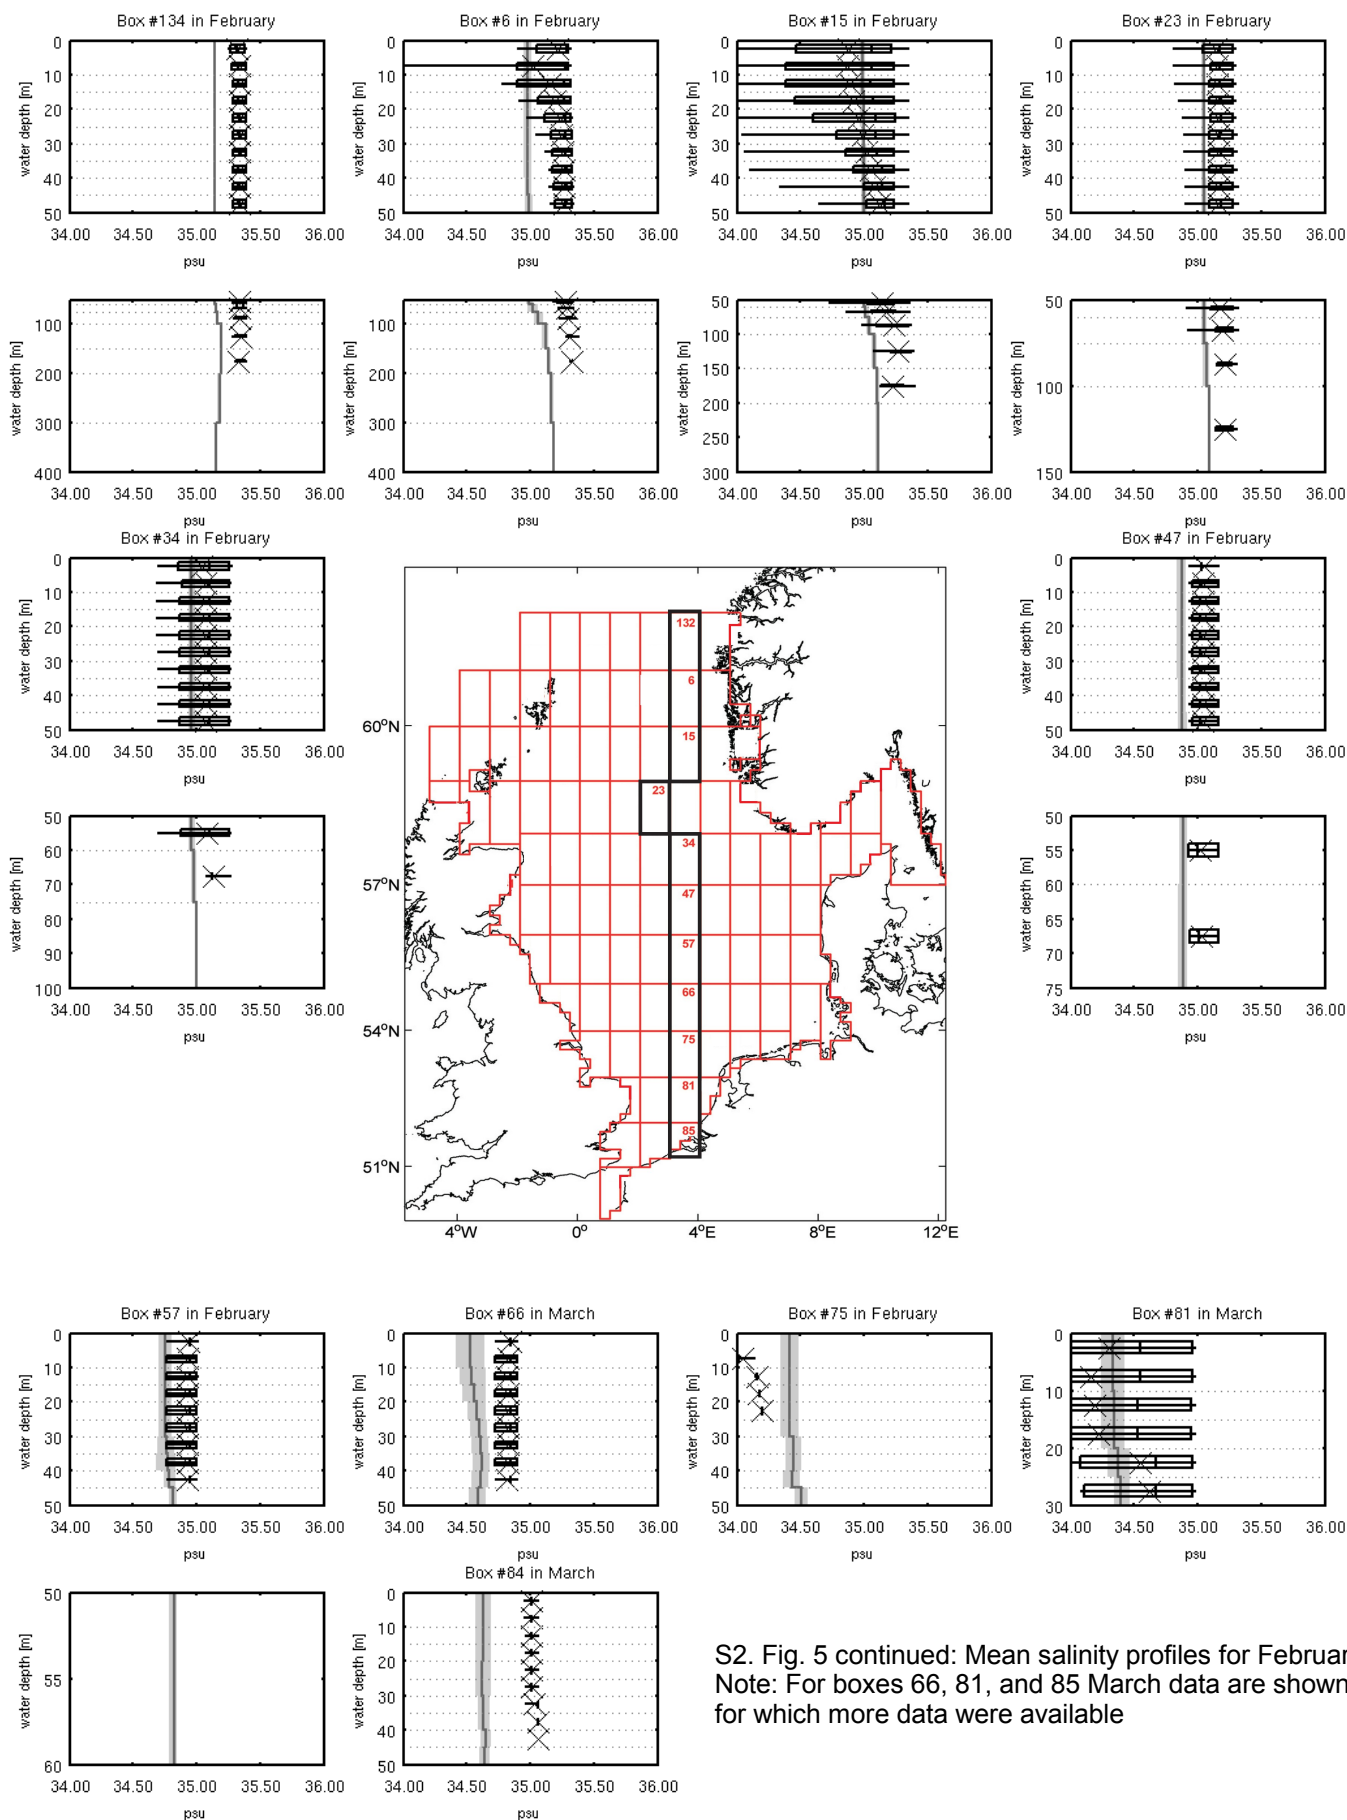

S2. Fig. 5 continued: Mean salinity profiles for February. Note: For boxes 66, 81, and 85 March data are shown for which more data were available
