# Supplementary material for: NW European shelf under climate warming: implications for open ocean – shelf exchange, primary production, and carbon absorption
Source: Copernicus journal article supplement (doi:10.5194/bg-10-3767-2013), 2013-06-12
Supplement: Supplementary file 2 [file bg-10-3767-2013-supplement.zip]

Archive with 2 entries (2 files):
- supplementary_S1.pdf
- supplementary_S2.pdf
